# Supplementary material
Source: publisher figshare collection journal article supplement (https://springernature.figshare.com/ndownloader/files/8329889)
Supplement: Supplementary file [file 8329889]

## Variant Classification Schema

| Variant ranking                          | Initial bioinformatic classification                                                                                                                                                                                                                                                                                                                                                                                                                          | Final classification                                                                                                                                                                                                                                                                                                            |                                                                                                                                                                           |
|------------------------------------------|---------------------------------------------------------------------------------------------------------------------------------------------------------------------------------------------------------------------------------------------------------------------------------------------------------------------------------------------------------------------------------------------------------------------------------------------------------------|---------------------------------------------------------------------------------------------------------------------------------------------------------------------------------------------------------------------------------------------------------------------------------------------------------------------------------|---------------------------------------------------------------------------------------------------------------------------------------------------------------------------|
| <b>Class 5 = pathogenic</b>              | Genomic coordinates fed to VEP on ENSEMBL 75:<br>"splice_donor_variant"<br>"splice_acceptor_variant"<br>"stop_gained"<br>"frameshift_variant"                                                                                                                                                                                                                                                                                                                 | Transcript abrogating variants (nonsense, frameshift, consensus splice site) with previous reports of pathogenicity                                                                                                                                                                                                             | Missense variants with functional characterisation demonstrating a functional effect relevant to the disease phenotype and multiple independent reports of pathogenicity. |
| <b>Class 4 = likely pathogenic</b>       | "stop_lost"<br>"initiator_codon_variant"<br>"inframe_insertion"<br>"inframe_deletion"<br>"missense variant" and 1000 genomes project combined MAF < 0.01 and VEST3 call deleterious                                                                                                                                                                                                                                                                           | Previously unreported variants predicted to lead to protein truncation (nonsense, frameshift, consensus splice site, initiator codon, non-stop). Variants predicted to abrogate the transcript but occurring in the last exon were called class 3 unless a functional effect or pathogenicity had been previously demonstrated. | Missense variants with supporting functional evidence, but lacking multiple independent reports of pathogenicity.                                                         |
| <b>Class 3 = uncertain significance</b>  | MAF < 0.01 and "splice_region_variant"<br>"incomplete_terminal_codon_variant"<br>"missense variant" and 1000 genomes project combined MAF < 0.01 and VEST3 call not available                                                                                                                                                                                                                                                                                 | Class 3 variants all have a minor allele frequency < 0.01 and include in-frame indels, splice region variants and missense variants with predicted deleterious consequence according to VEST3 or conflicting reports of pathogenicity.                                                                                          |                                                                                                                                                                           |
| <b>Class 2 = probable non-pathogenic</b> | 1000 genomes combined MAF > 0.01 and/or "missense variant" and VEST3 call tolerated                                                                                                                                                                                                                                                                                                                                                                           | Class 1 and class 2 variants are comprised of missense variants which either have a MAF < 0.01 but are predicted to be benign or a MAF ≥ 0.01, synonymous variants and non-coding variants (intronic, UTR, down- and up-stream).                                                                                                |                                                                                                                                                                           |
| <b>Class 1 = non-pathogenic</b>          | "synonymous_variant"<br>"stop_retained_variant"<br>"coding_sequence_variant"<br>"5_prime_UTR_variant"<br>"3_prime_UTR_variant"<br>"non_coding_exon_variant"<br>"nc_transcript_variant"<br>"intron_variant"<br>"NMD_transcript_variant"<br>"upstream_gene_variant"<br>"downstream_gene_variant"<br>"TFBS_ablation"<br>"TFBS_amplification"<br>"TF_binding_site_variant"<br>"regulatory_region_variant"<br>"regulatory_region_ablation"<br>"intergenic_variant" |                                                                                                                                                                                                                                                                                                                                 |                                                                                                                                                                           |
